# Supplementary material
Source: publisher figshare collection journal article supplement (https://frontiersin.figshare.com/ndownloader/files/13300910)
Supplement: Supplementary file 1 [file 13300910]

## Sheet: Sheet1
A) Number of reads for each biomarker OTU, per sample. Sample names are described in Table 1. Mucus samples are shown in light grey, tissue samples shown in white, and seawater samples shown in dark grey.
				Sample Name
OTU Identity	Taxonomic Rank	Biomarker	Effect Size	PA-N28-T1	PA-N28-T2	PA-N28-T3	PA-N28-MU	PA-C24-T1	PA-C24-T2	PA-C24-T3	PA-C24-MU	PA-G08-T1	PA-G08-T2	PA-G08-T3	PA-G08-MU	WA-N08	WA-G11
Spirochaeta 2	Genus	Tissue	4.02059	914	635	696	7	165	307	356	8	94	159	231	3	0	0
Mycoplasma	Genus	Tissue	2.36706	48	64	71	0	33	73	100	1	17	22	14	0	0	0
Rickettsiales	Order	Tissue	2.33993	171	214	110	5	67	306	443	3	30	18	157	7	0	0
Campylobacterales	Order	Tissue	1.84268	61	32	12	0	5	9	21	0	3	9	3	0	0	0
Flavobacteriaceae	Family	Tissue	1.71779	56	66	64	0	11	69	84	0	0	9	30	0	0	0
Terasakiellaceae	Family	Tissue	1.41049	599	45	72	0	28	71	93	0	1	0	29	0	0	0
Paracoccus marcusii	Genus	Mucus	-1.46697	1	0	18	17	0	0	0	18	0	0	0	5	3	0
	Total reads after processing			3392	6060	1929	696	2227	3274	4038	1459	2744	2553	5220	363	3997	6076
B) Proportion of reads, for each biomarker OTU. Sample names are described in Table 1. Mucus samples are shown in light grey, tissue samples shown in white, and seawater samples shown in dark grey.
				Sample Name
OTU Identity	Taxonomic Rank	Biomarker	Effect Size	PA-N28-T1	PA-N28-T2	PA-N28-T3	PA-N28-MU	PA-C24-T1	PA-C24-T2	PA-C24-T3	PA-C24-MU	PA-G08-T1	PA-G08-T2	PA-G08-T3	PA-G08-MU	WA-N08	WA-G11
Spirochaeta 2	Genus	Tissue	4.02059	26.9458	10.4785	36.0809	1.00575	7.40907	9.37691	8.81625	0.548321	3.42566	6.22797	4.42529	0.826446	0	0
Mycoplasma	Genus	Tissue	2.36706	1.41509	1.05611	3.68066	0	1.48181	2.22969	2.47647	0.0685401	0.619534	0.861731	0.268199	0	0	0
Rickettsiales	Order	Tissue	2.33993	5.04127	3.53135	5.70244	0.718391	3.00853	9.34637	10.9708	0.20562	1.09329	0.705053	3.00766	1.92837	0	0
Campylobacterales	Order	Tissue	1.84268	1.79835	0.528053	0.622084	0	0.224517	0.274893	0.520059	0	0.109329	0.352526	0.0574713	0	0	0
Flavobacteriaceae	Family	Tissue	1.71779	1.65094	1.08911	3.31778	0	0.493938	2.10751	2.08024	0	0	0.352526	0.574713	0	0	0
Terasakiellaceae	Family	Tissue	1.41049	17.6592	0.742574	3.7325	0	1.2573	2.1686	2.30312	0	0.0364431	0	0.555556	0	0	0
Paracoccus marcusii	Genus	Mucus	-1.46697	0.0294811	0	0.933126	2.44253	0	0	0	1.23372	0	0	0	1.37741	0.0750563	0
